# Supplementary material for: Inhibitory Effects of Antiviral Drug Candidates on Canine Parvovirus in F81 cells
Source: MDPI journal article supplement (doi:10.3390/v11080742), 2019-08-13
Supplement: s1 [file s1]

**Table S1.** Percentage inhibition (%) of 21 drugs and 2 other tested drugs

| Plate number | Well number | Catalogue number | Drug name | Percentage inhibition           |                                 |                    |
|--------------|-------------|------------------|-----------|---------------------------------|---------------------------------|--------------------|
|              |             |                  |           | (mean $\pm$ s.d.%) <sup>a</sup> | (mean $\pm$ s.d.%) <sup>b</sup> |                    |
| 1            | 4           | H2               | S1627     | Nitazoxanide                    | 106.59 $\pm$ 2.79               | 108.00 $\pm$ 17.74 |
| 2            | 11          | F7               | S4106     | Cloasantel                      | 80.64 $\pm$ 7.87                | 71.28 $\pm$ 3.17   |
| 3            | 11          | E7               | S4105     | Cloasantel Sodium               | 69.76 $\pm$ 6.06                | 58.14 $\pm$ 7.28   |
| 4            | 16          | D6               | S1149     | Gemcitabine HCl                 | 64.18 $\pm$ 0.97                | 48.93 $\pm$ 3.57   |
| 5            | 5           | F4               | S1778     | Trifluridine                    | 57.11 $\pm$ 5.45                | 62.4 $\pm$ 6.3     |
| 6            | 4           | D10              | S1714     | Gemcitabine                     | 56.1 $\pm$ 2.09                 | 42.8 $\pm$ 6.13    |
| 7            | 1           | D10              | S1199     | Cladribine                      | 50.92 $\pm$ 1.58                | 46.33 $\pm$ 2.01   |
| 8            | 1           | E11              | S1210     | Methotrexate                    | 43.67 $\pm$ 6.07                | 41.28 $\pm$ 1.95   |
| 9            | 1           | E9               | S1192     | Raltitrexed                     | 35.11 $\pm$ 3.19                | 42.1 $\pm$ 4.45    |
| 10           | 8           | H5               | S2517     | Maprotiline HCl                 | 34.2 $\pm$ 7.09                 | 30.62 $\pm$ 3.14   |
| 11           | 14          | C3               | S4591     | Nitroxoline                     | 32.28 $\pm$ 7.83                | 11.77 $\pm$ 7.45   |
| 12           | 12          | F5               | S4218     | Amoxapine                       | 30.06 $\pm$ 6.89                | 34.69 $\pm$ 9.61   |
| 13           | 2           | B1               | S1218     | Clofarabine                     | 29.54 $\pm$ 3.8                 | 34.86 $\pm$ 5.45   |
| 14           | 3           | C1               | S1394     | Pizotifen Malate                | 29.2 $\pm$ 2.72                 | 26.48 $\pm$ 2.91   |
| 15           | 16          | D8               | S1648     | Cytarabine                      | 28.66 $\pm$ 4.67                | 30.5 $\pm$ 4.22    |
| 16           | 8           | F7               | S2541     | Clomipramine HCl                | 26.72 $\pm$ 8.8                 | 24.01 $\pm$ 8.42   |
| 17           | 17          | B7               | S7785     | Pemetrexed Disodium Hydrate     | 26.56 $\pm$ 2.12                | 30.28 $\pm$ 5.74   |
| 18           | 16          | C6               | S1135     | Pemetrexed                      | 26.53 $\pm$ 4.13                | 39.29 $\pm$ 10.64  |
| 19           | 4           | D5               | S1652     | Monobenzone                     | 18.47 $\pm$ 1.15                | 17.98 $\pm$ 4.7    |
| 20           | 8           | F6               | S2528     | Ciclopirox                      | 14.12 $\pm$ 5.32                | 9.76 $\pm$ 4.58    |
| 21           | 13          | G6               | S4416     | Trimipramine Maleate            | 12.85 $\pm$ 3.68                | 20.2 $\pm$ 3.13    |
| 22           |             |                  | S2597     | Oseltamivir                     | 2.13 $\pm$ 2.41                 | 3.6 $\pm$ 2.89     |
| 23           |             |                  | S1516     | Cidofovir                       | -1.28 $\pm$ 1.03                | -6.1 $\pm$ 4.71    |

<sup>a</sup> The percentage CPE inhibition of drugs were obtained by treating cells with drugs 1 hour prior to virus infection.

<sup>b</sup> The percentage CPE inhibition of drugs were obtained by adding drugs 1 hour post virus infection.

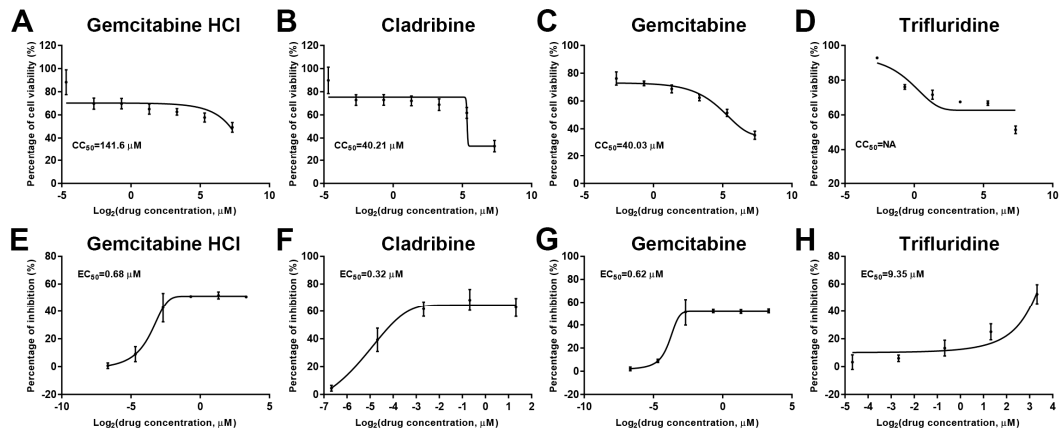

**Figure S1.** Evaluation of cytotoxicity and anti-CPV efficacy of other four drugs. Dose-dependent curves show cell viability of F81 cells with 4-fold serial dilution concentrations of Gemcitabine HCl (A), Cladribine (B), Gemcitabine (C) and Trifluridine (D). Dose-dependent curves show the anti-CPV efficacy of 4-fold serially diluted Gemcitabine HCl (E), Cladribine (F), Gemcitabine (G) and Trifluridine (H). Error bars represent standard errors from three independent experiments. The CC<sub>50</sub>s and EC<sub>50</sub>s were determined by a best-fit Log(dose)-response curve-fitting in GraphPad Prism 7.

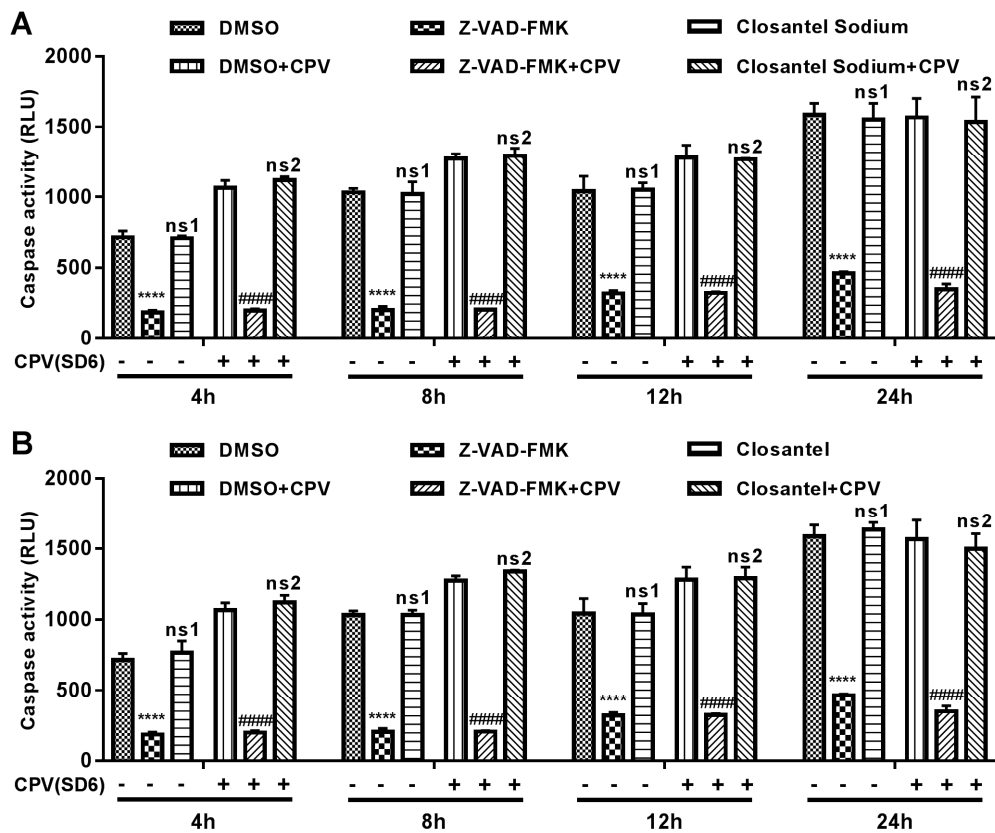

**Figure S2.** Caspase 3/7 activity of Closantel Sodium or Closantel treated F81 cells. F81 cells were pre-treated with 0.1% DMSO, Z-VAD-FMK (as a control to inhibit apoptosis), or Closantel Sodium (A) or Closantel (B) for 1 h, then Caspase 3/7 activity of F81 cells with or without CPV infection were analysed at 4 hpi, 8 hpi, 12 hpi and 24 hpi. Statistical analysis was carried out using one-way ANOVA and Dunnett's multiple comparisons test. ns1; \*  $p < 0.05$ ; \*\*  $p < 0.01$ ; \*\*\*  $p < 0.005$ ; \*\*\*\*  $p < 0.001$  (compared to 0.1% DMSO-treated cells without CPV infection, at each time point). ns2; #  $p < 0.05$ ; ##  $p < 0.01$ ; ###  $p < 0.005$ ; ####  $p < 0.001$  (compared to 0.1% DMSO-treated cells with CPV infection, at each time point).
